# Supplementary material for: Simultaneous photo-induced polymerization and surface modification by microfluidic spinning to produce functionalized polymer microfibers: the effect of their surface modification on cell adhesion
Source: Royal Society of Chemistry journal article supplement (doi:10.1039/d3lp00032j), 2023-11-10
Supplement: d3lp00032j1.pdf [file d3lp00032j1.pdf]

# Simultaneous photo-induced polymerization and surface modification by microfluidic spinning to produce functionalized polymer microfibers

Wasif Razzaq,<sup>a,b</sup> Christophe A. Serra,<sup>a</sup> Candice Dussouillez,<sup>c</sup> Naji Kharouf,<sup>d</sup> Irene Andrea Acuña Mejía,<sup>a</sup> Antoine Kichler,<sup>c</sup> Delphine Chan-Seng<sup>a</sup>

<sup>a</sup> Université de Strasbourg, CNRS, Institut Charles Sadron UPR 22, F-67000 Strasbourg, France

<sup>b</sup> Department of Materials, National Textile University, Sheikhpura Road, Faisalabad 37610, Pakistan

<sup>c</sup> Université de Strasbourg, CNRS, Laboratoire de Conception et Applications des Molécules Bioactives UMR 7199, 3Bio Team, F-67000 Strasbourg, France

<sup>d</sup> INSERM, UMR\_S 1121 Biomaterials and Bioengineering, 1 rue Eugène Boeckel, 67000 Strasbourg, France and Université de Strasbourg, Faculté de Chirurgie Dentaire, 8 rue Sainte Elisabeth, 67000 Strasbourg, France

## TABLE OF CONTENT

|                                                                                                                                                                                                                                                                                                                                                                                                                                                                                          |   |
|------------------------------------------------------------------------------------------------------------------------------------------------------------------------------------------------------------------------------------------------------------------------------------------------------------------------------------------------------------------------------------------------------------------------------------------------------------------------------------------|---|
| <b>Fig. S1</b> EDS spectra of a) unmodified, b) (SH) <sub>3</sub> -modified, and c) (NH <sub>2</sub> ) <sub>3</sub> -modified fibers.                                                                                                                                                                                                                                                                                                                                                    | 2 |
| <b>Fig. S2</b> Simultaneous photopolymerization and surface modification to produce amine-functionalized microfibers using either hexamethylenediamine/(NH <sub>2</sub> ) <sub>2</sub> (left) or tris(2-aminoethyl)amine/(NH <sub>2</sub> ) <sub>3</sub> (right) confirmed by Kaiser test (blue-violet solution characteristic of the Ruhemann's complex formed by reaction of the ninhydrin with the primary amines).                                                                   | 3 |
| <b>Fig. S3</b> Simultaneous photopolymerization and surface modification to produce thiol-functionalized microparticles using trimethylolpropane tris(3-mercaptopropionate) confirmed by Ellman's test (yellow color due to the reaction of free thiols with 5,5'-dithio-bis-(2-nitrobenzoic acid) in inset) and SEM images. Unlike the SEM images presented in the main article and Figure S3, these images were obtained on a Hitachi SU 8010 Ultra High-Resolution FE-SEM microscope. | 3 |
| <b>Fig. S4</b> SEM images of microfibers incubated with RAW264.7 cells for 48 h: a) unmodified fibers and amine-modified fibers prepared using b) 1, c) 5, and d) 10 mol% of (NH <sub>2</sub> ) <sub>3</sub> .                                                                                                                                                                                                                                                                           | 4 |
| <b>Fig. S5</b> Light microscopy of fibers obtained using 10 mol% of (SH) <sub>3</sub> in the sheath phase and after 26 h of incubation with murine RAW264.7 macrophages.                                                                                                                                                                                                                                                                                                                 | 4 |
| <b>Fig. S6.</b> Evaluation of the biocompatibility of the neutral and 10%-modified fibers. RAW cells were incubated with increasing amounts of non-modified and 10% thiol-modified fibers and the cell viability was determined after 48 hours using a CellTiter-Glo 2.0 Cell viability assay.                                                                                                                                                                                           | 5 |
| <b>Fig. S7</b> Light microscopy of 10% thiol-modified fibers after 48 hours of incubation with HCT116 cells. Cell adhesion was observed as shown by the black arrows.                                                                                                                                                                                                                                                                                                                    | 5 |

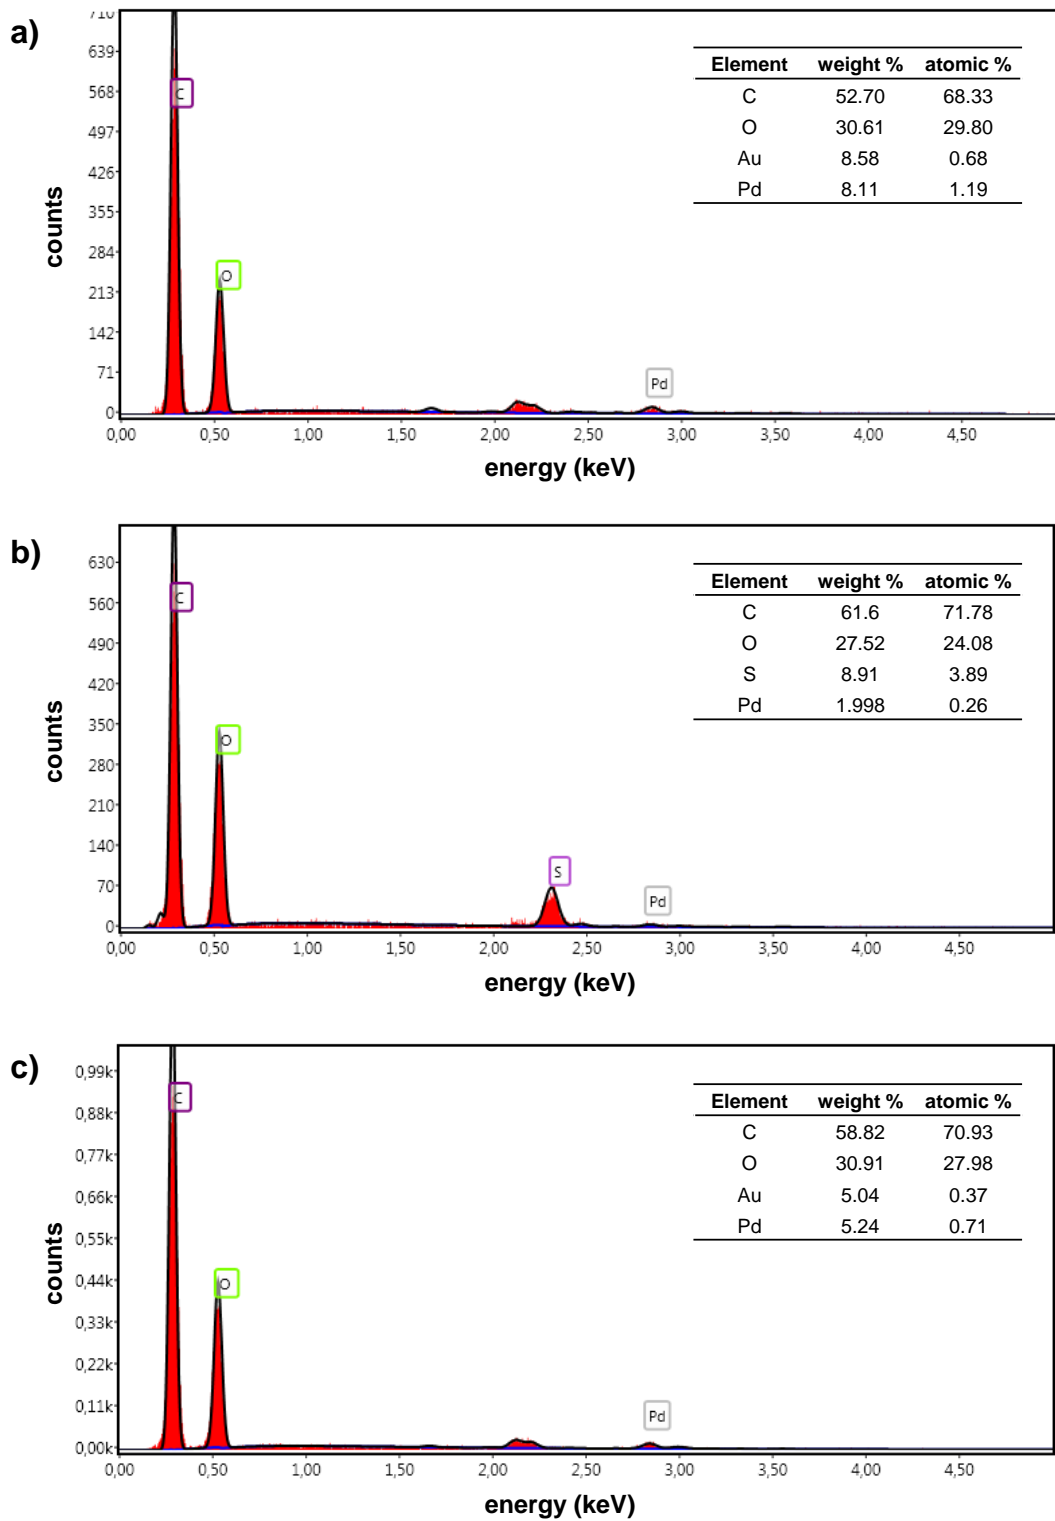

Fig. S1 EDS spectra of a) unmodified, b) (SH)<sub>3</sub>-modified, and c) (NH<sub>2</sub>)<sub>3</sub>-modified fibers.

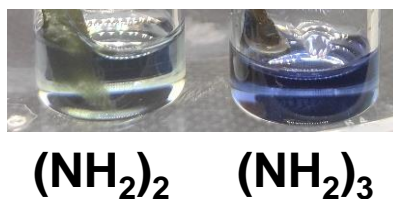

**Fig. S2** Simultaneous photopolymerization and surface modification to produce amine-functionalized microfibers using either hexamethylenediamine/ $(\text{NH}_2)_2$  (left) or tris(2-aminoethyl)amine/ $(\text{NH}_2)_3$  (right) confirmed by Kaiser test (blue-violet solution characteristic of the Ruhemann's complex formed by reaction of the ninhydrin with the primary amines).

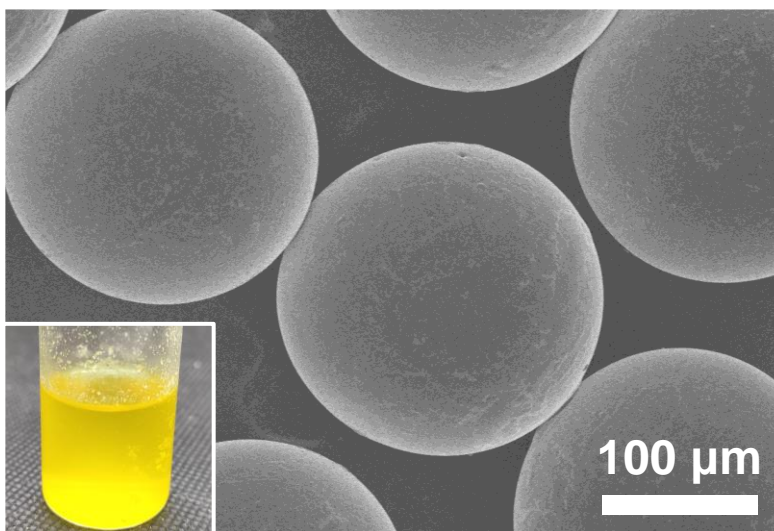

**Fig. S3** Simultaneous photopolymerization and surface modification to produce thiol-functionalized microparticles using trimethylolpropane tris(3-mercaptopropionate) confirmed by Ellman's test (yellow color due to the reaction of free thiols with 5,5'-dithio-bis-(2-nitrobenzoic acid) in inset) and SEM images. Unlike the SEM images presented in the main article and Figure S3, these images were obtained on a Hitachi SU 8010 Ultra High-Resolution FE-SEM microscope.

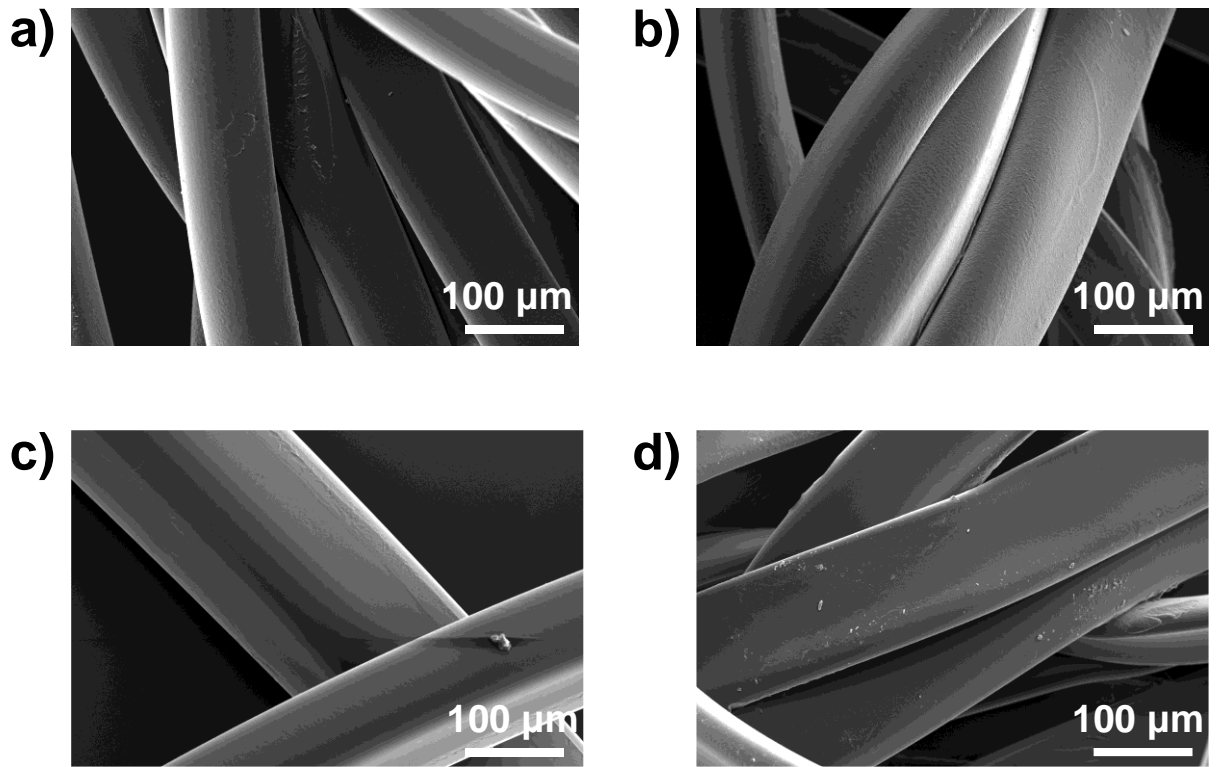

**Fig. S4** SEM images of microfibers incubated with RAW264.7 cells for 48 h: a) unmodified fibers and amine-modified fibers prepared using b) 1, c) 5, and d) 10 mol% of  $(\text{NH}_2)_3$ .

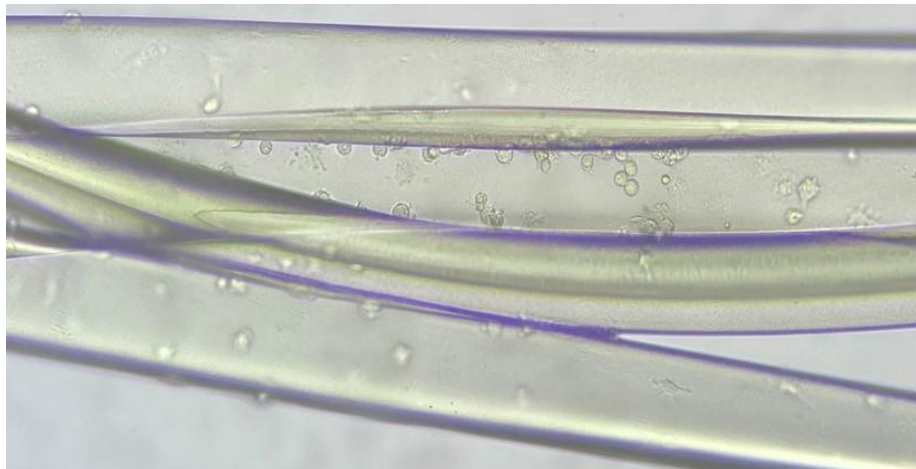

**Fig. S5** Light microscopy of fibers obtained using 10 mol% of  $(\text{SH})_3$  in the sheath phase and after 26 h of incubation with murine RAW264.7 macrophages.

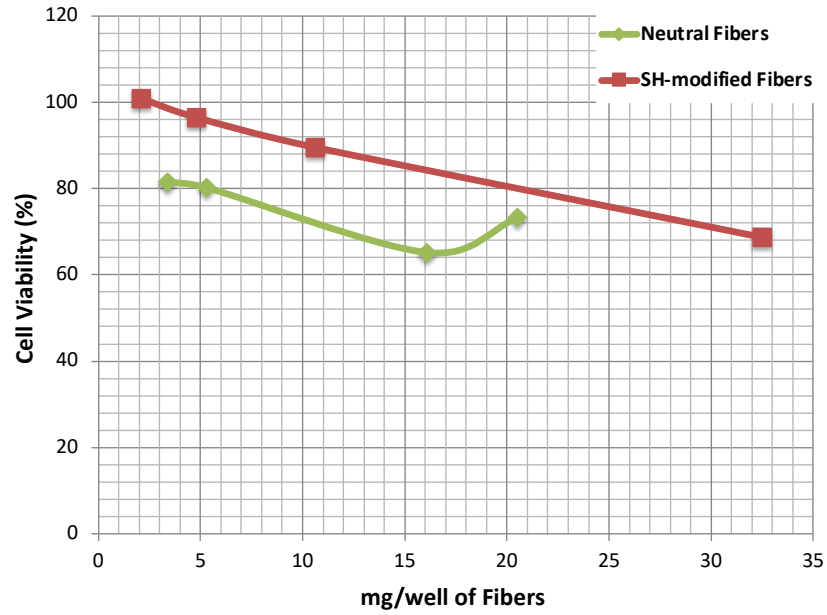

**Fig. S6.** Evaluation of the biocompatibility of the neutral and 10%-modified fibers. RAW cells were incubated with increasing amounts of non-modified and 10% thiol-modified fibers and the cell viability was determined after 48 hours using a CellTiter-Glo 2.0 Cell viability assay.

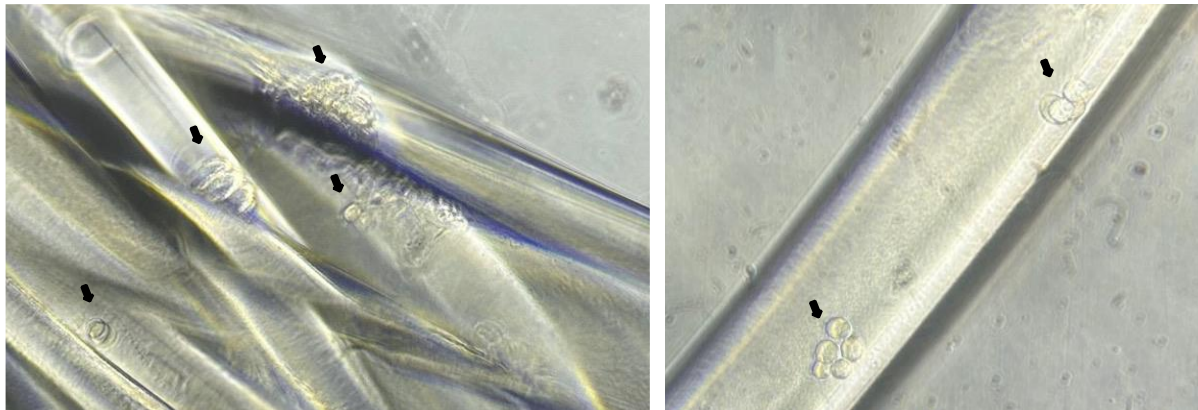

**Fig. S7** Light microscopy of 10% thiol-modified fibers after 48 hours of incubation with HCT116 cells. Cell adhesion was observed as shown by the black arrows.
